# Supplementary material for: The use of local structural similarity of distant homologues for crystallographic model building from a molecular-replacement solution
Source: PubMed Central journal article supplement (PMC7057216; doi:10.1107/s2059798320000455), 2020-02-28
Supplement: d-76-00248-sup1.pdf [file d-76-00248-sup1.pdf]

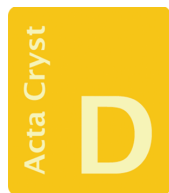

STRUCTURAL  
BIOLOGY

**Volume 76 (2020)**

**Supporting information for article:**

**The use of local structural similarity of distant homologues for crystallographic model building from a molecular-replacement solution**

**Grzegorz Chojnowski, Koushik Choudhury, Philipp Heuser, Egor Sobolev, Joana Pereira, Umut Oezugurel and Victor S. Lamzin**

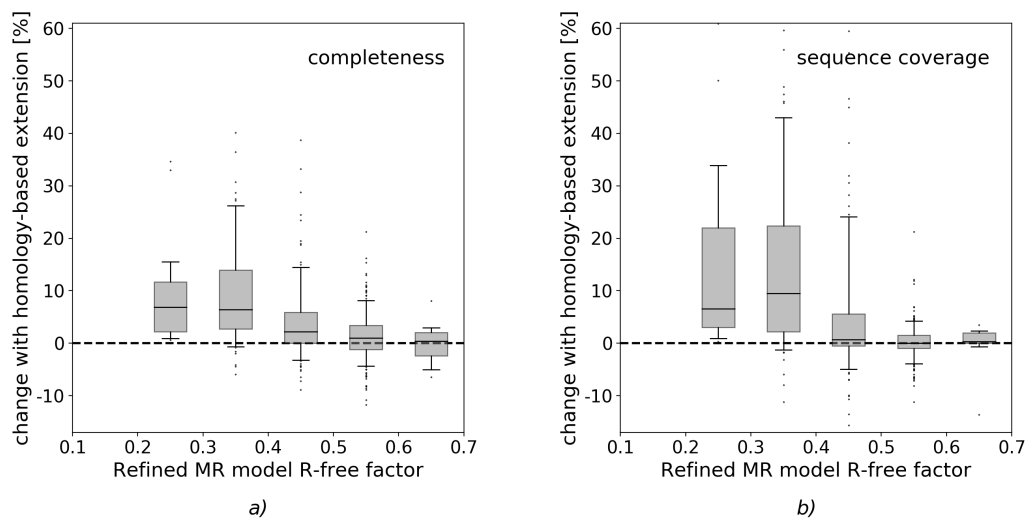

**Figure S1** The improvement in model building for test set II at a resolution between 2 and 3 Å as a function of refined MR model R-free factor. a) the fraction of residues built; b) sequence coverage. Box plot whiskers correspond to the 5<sup>th</sup> and 95<sup>th</sup> percentile.

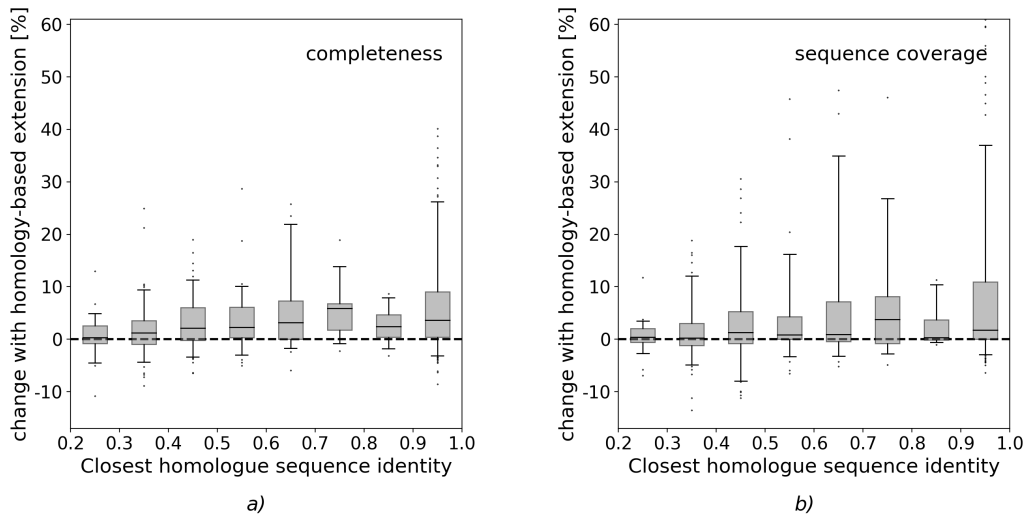

**Figure S2** The improvement in model building for test set II at a resolution between 2 and 3 Å as a function of sequence identity to a closest homologue used for model extension. a) the fraction of residues built; b) sequence coverage. Box plot whiskers correspond to the 5<sup>th</sup> and 95<sup>th</sup> percentile.

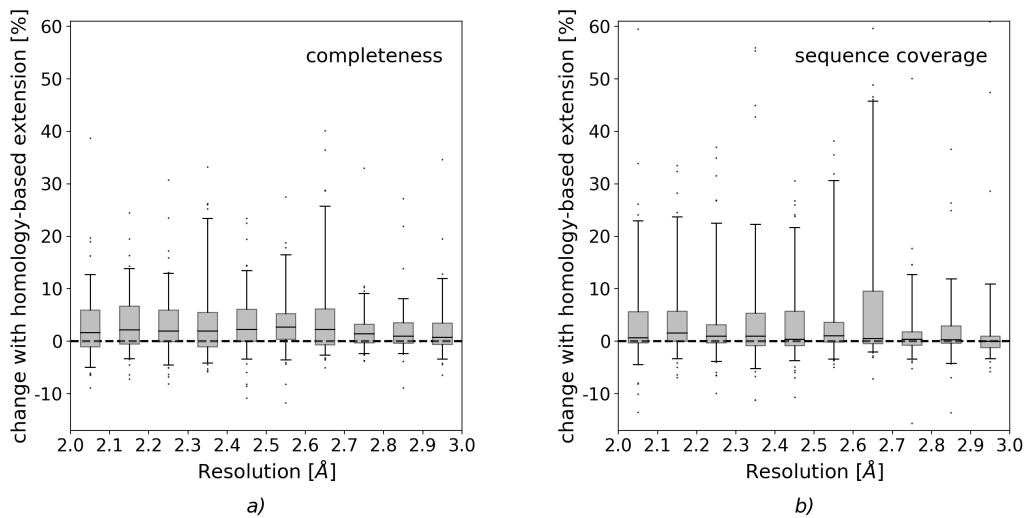

**Figure S3** The improvement in model building for test set II at a resolution between 2 and 3 Å as a function of resolution. a) the fraction of residues built; b) sequence coverage. Box plot whiskers correspond to the 5<sup>th</sup> and 95<sup>th</sup> percentile.

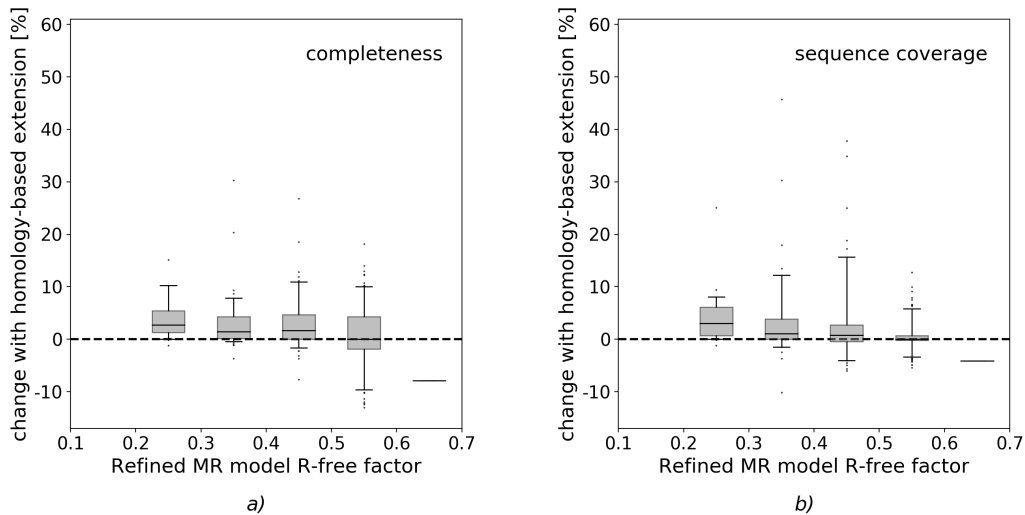

**Figure S4** The improvement in model building for test set II at a resolution between 1 and 2 Å as a function of refined MR model R-free factor. a) the fraction of residues built; b) sequence coverage. Box plot whiskers correspond to the 5<sup>th</sup> and 95<sup>th</sup> percentile.

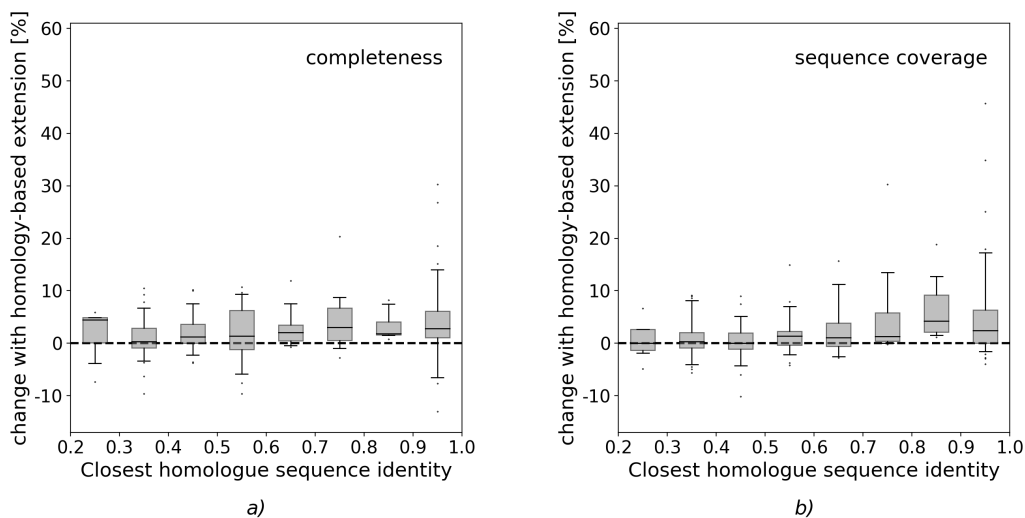

**Figure S5** The improvement in model building for test set II at a resolution between 1 and 2 Å as a function of of sequence identity to a closest homologue used for model extension. a) the fraction of residues built; b) sequence coverage. Box plot whiskers correspond to the 5<sup>th</sup> and 95<sup>th</sup> percentile.

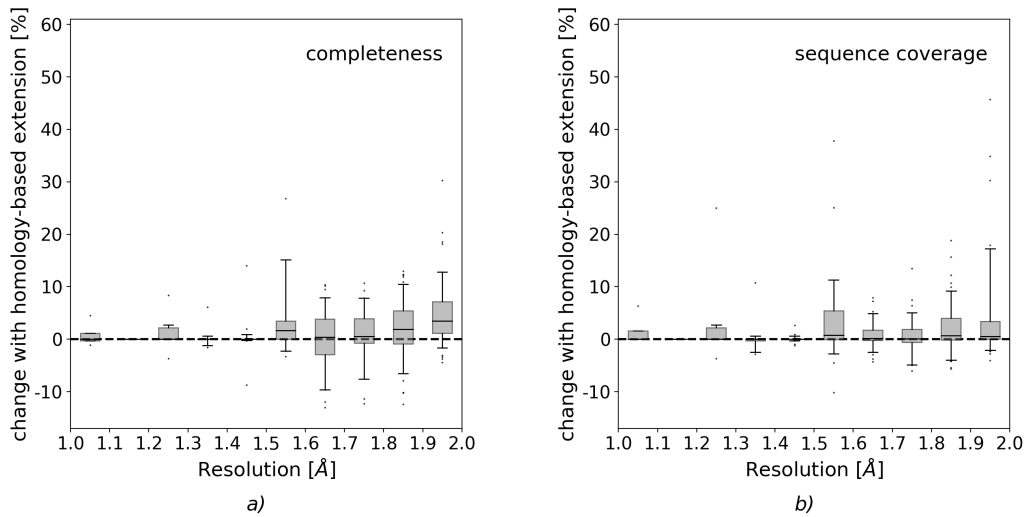

**Figure S6** The improvement in model building for test set II at a resolution between 1 and 2 Å as a function of resolution. a) the fraction of residues built; b) sequence coverage. Box plot whiskers correspond to the 5<sup>th</sup> and 95<sup>th</sup> percentile.

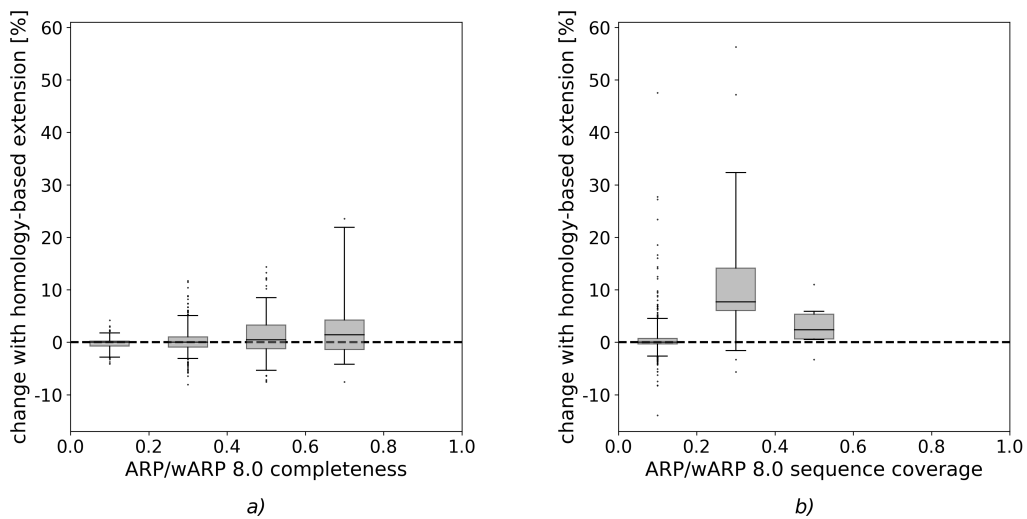

**Figure S7** The improvement in model building for test set II at a resolution between 3 and 4 Å as a function of a) model completeness and b) sequence coverage. Box plot whiskers correspond to the 5<sup>th</sup> and 95<sup>th</sup> percentile.

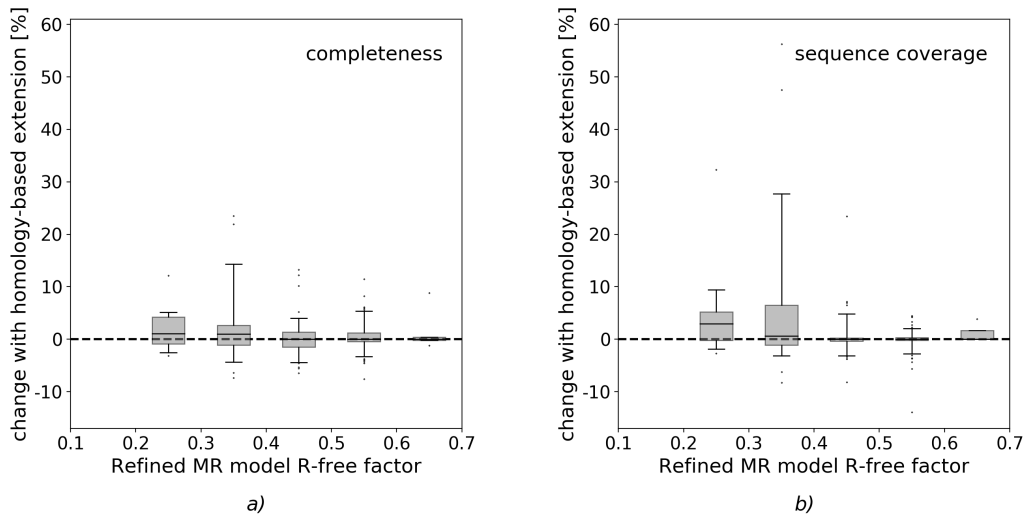

**Figure S8** The improvement in model building for test set II at a resolution between 3 and 4 Å as a function of refined MR model R-free factor. a) the fraction of residues built; b) sequence coverage. Box plot whiskers correspond to the 5<sup>th</sup> and 95<sup>th</sup> percentile.

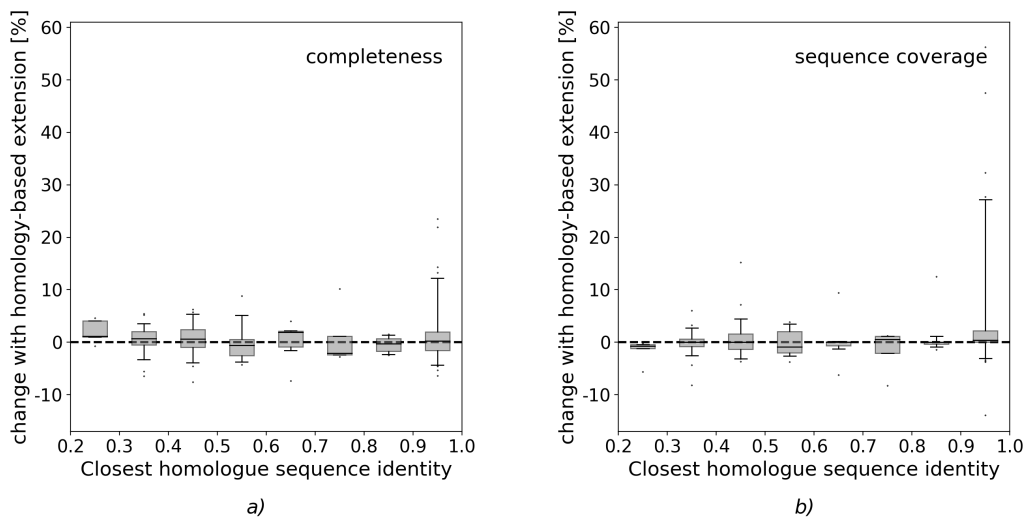

**Figure S9** The improvement in model building for test set II at a resolution between 3 and 4 Å as a function of of sequence identity to a closest homologue used for model extension. a) the fraction of residues built; b) sequence coverage. Box plot whiskers correspond to the 5<sup>th</sup> and 95<sup>th</sup> percentile.

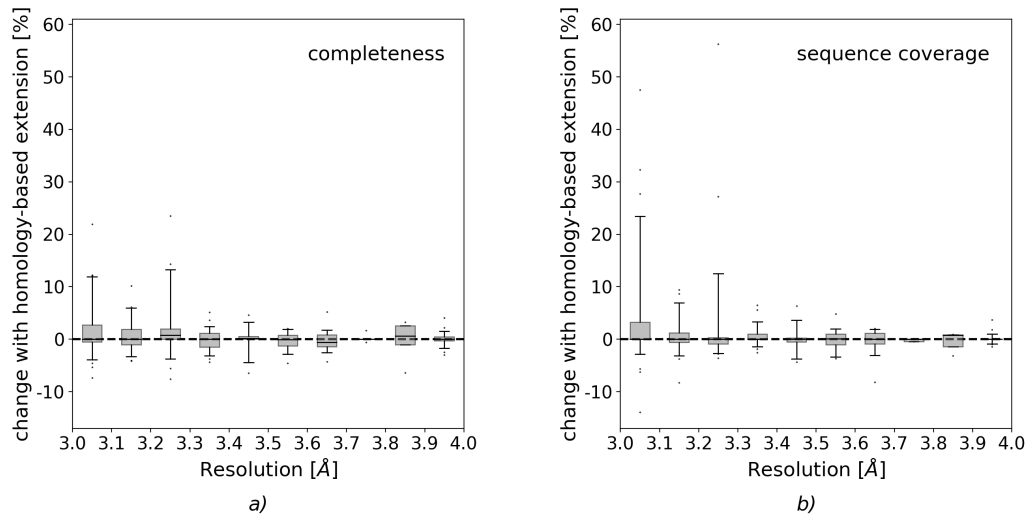

**Figure S10** The improvement in model building for test set II at a resolution between 3 and 4 Å as a function of resolution. a) the fraction of residues built; b) sequence coverage. Box plot whiskers correspond to the 5<sup>th</sup> and 95<sup>th</sup> percentile.
